# Supplementary material
Source: PubMed Central journal article supplement (PMC2945537)

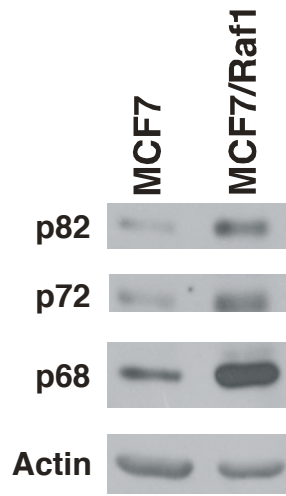

**Supplementary Figure 1**

Supplement: supp_M110.143792_jbc.M110.143792-1.pdf [file supp_M110.143792_jbc.M110.143792-1.pdf]
